# Supplementary material
Source: publisher figshare collection journal article supplement (https://sage.figshare.com/ndownloader/files/20161805)
Supplement: Supplementary file 1 [file 20161805]

**Supplementary Table 1**

**Supplementary Table 1.:**

**Calculations of Estimated NTD ETOPFA Rate Data**

**From De Wals 2007, New England Journal of Medicine (Reference (()))**

| **Province** | **Numbers, De Wals** | | | | | |
| --- | --- | --- | --- | --- | --- | --- |
| **Pre** | | **Partial** | | **Post** | |
| NFL | 131 | 28727 | 18 | 12666 | 10 | 13135 |
| PEI | 17 | 8183 | 4 | 3784 | 0 | 3756 |
| NS | 142 | 52226 | 32 | 24212 | 31 | 24660 |
| QU | 701 | 395681 | 227 | 178827 | 186 | 191059 |
| MN | 121 | 78727 | 32 | 36267 | 36 | 38692 |
| AL | 207 | 184440 | 68 | 93698 | 70 | 103690 |
| BC | 214 | 222207 | 115 | 106435 | 84 | 112042 |
|  |  |  |  |  |  |  |
| **Province** | **Rates with ETOPFA's, De Wals** | | |  |  |  |
| **Pre** | **Partial** | **Post** |  |  |  |
| NFL | 45.6 | 14.2 | 7.6 |  |  |  |
| PEI | 20.8 | 10.6 | 0.0 |  |  |  |
| NS | 27.2 | 13.2 | 12.6 |  |  |  |
| QU | 17.7 | 12.7 | 9.7 |  |  |  |
| MN | 15.4 | 8.8 | 9.3 |  |  |  |
| AL | 11.2 | 7.3 | 6.8 |  |  |  |
| BC | 9.6 | 10.8 | 7.5 |  |  |  |

**From Health Canada – Congenital Anomalies in Canada 2013 (Reference (()))**

| **Province** | **Rates without ETOPFA's** | | |
| --- | --- | --- | --- |
| **Abbrev** | **NTD 1991-96** | **NTD 1997-00** | **NTD 2001-07** |
| NFL | 30.5 | 8.3 | 4.7 |
| PEI | 9.8 |  |  |
| NS | 19.8 | 9.6 | 5.1 |
| QB | 6.9 | 5.4 | 3.3 |
| MN | 10 | 7.8 | 5.5 |
| ALB | 7.8 | 4.7 | 4.2 |
| BC | 8.8 | 6.8 | 6 |
|  |  |  |  |
| **Province** | **ETOPFA Rates** | | |
| **Pre** | **Partial** | **Post** |
| NFL | 15.1 | 5.9 | 2.9 |
| PEI | 11.0 |  |  |
| NS | 7.4 | 3.6 | 7.5 |
| QU | 10.8 | 7.3 | 6.4 |
| MN | 5.4 | 1.0 | 3.8 |
| AL | 3.4 | 2.6 | 2.6 |
| BC | 0.8 | 4.0 | 1.5 |
|  |  |  |  |
| **Province** | **% ETOPFA** | | |
| **Pre** | **Partial** | **Post** |
| NFL | 33.1% | 41.6% | 38.3% |
| PEI | 52.8% |  |  |
| NS | 27.2% | 27.4% | 59.4% |
| QU | 61.1% | 57.5% | 66.1% |
| MN | 34.9% | 11.6% | 40.9% |
| AL | 30.5% | 35.2% | 37.8% |
| BC | 8.6% | 37.1% | 20.0% |
|  |  |  |  |
| **Average** | 32.5683% | 35.0535% | 43.7402% |
|  |  |  |  |
|  |  |  |  |
| **Province** | **Updated Rates with ETOPFA's** | | |
| **NTD91-96R** | **NTD97-00R** | **NTD01-07R** |
| Newfoundland and Labrador | 45.6 | 14.2 | 7.6 |
| Prince Edward Island | 20.8 | 10.6 |  |
| Nova Scotia | 27.2 | 13.2 | 12.6 |
| Quebec | 17.7 | 12.7 | 9.7 |
| Manitoba | 15.4 | 8.8 | 9.3 |
| Alberta | 11.2 | 7.3 | 6.8 |
| British Columbia | 9.6 | 10.8 | 7.5 |
| Saskatchewan | 17.6 | 8.9 | 8.9 |
| Ontario | 14.1 | 9.4 | 7.1 |
| New Brunswick | 23.1 | 11.2 | 6.2 |
